# Supplementary material
Source: publisher site journal article supplement (https://www.degruyterbrill.com/publication/isbn/9783486718171/downloadAsset/9783486718171_Buchinformation.pdf)
Supplement: Supplementary file 1 [file 9783486718171_Buchinformation.pdf]

### **Willi Brandts Ostpolitik im Buch/Aussöhnung mit Polen**

In der Reihe »Akten zur Auswärtigen Politik der Bundesrepublik Deutschland« ist nach Aufhebung der dreißigjährigen Sperrfrist soeben der Band zum Jahr 1970 erschienen. Er enthält die bahnbrechenden Verhandlungen Willi Brandts und Egon Bahrs, die zur historischen Aussöhnung mit Polen führten.

Aus Anlaß des dreißigsten Jahrestages der Unterzeichnung des Warschauer Vertrags wurde der Band in einem Festakt im Auswärtigen Amt Egon Bahr, Bundesaußenminister Joschka Fischer und heutigen Vertretern der polnischen Verhandlungspartner überreicht.

Egon Bahr hielt die Zuhörer in Atem durch überzeugende Parallelen zur Gegenwart. Von polnischer Seite sprach Andrzej Ananicz, Staatssekretär im Außenministerium Polens.

**Akten zur Auswärtigen Politik der Bundesrepublik Deutschland**  
Herausgegeben im Auftrag des Auswärtigen Amts vom Institut für Zeitgeschichte.

Haupterausgeber: Hans-Peter Schwarz, Mitherausgeber: Helga Haftendorn, Klaus Hildebrand, Werner Link, Horst Möller und Rudolf Morse.

**1970**

Bearb. von Ilse Dorothee Pautsch, Daniela Taschler, Franz Eibl, Frank Heinlein, Mechthild Lindemann und Matthias Peter

Wiss. Leiter: Rainer A. Blasius.

2001. CVII, 2.494 S. in 3 Teilbänden, € 180,-

ISBN 978-3-486-56498-3
